# Supplementary material for: A hemagglutination-based, semi-quantitative test for point-of-care determination of SARS-CoV-2 antibody levels
Source: bioRxiv or medRxiv preprint supplement (doi:10.1101/2021.05.01.21256452), 2021-05-04

**Supplemental Figure 1**

**A**

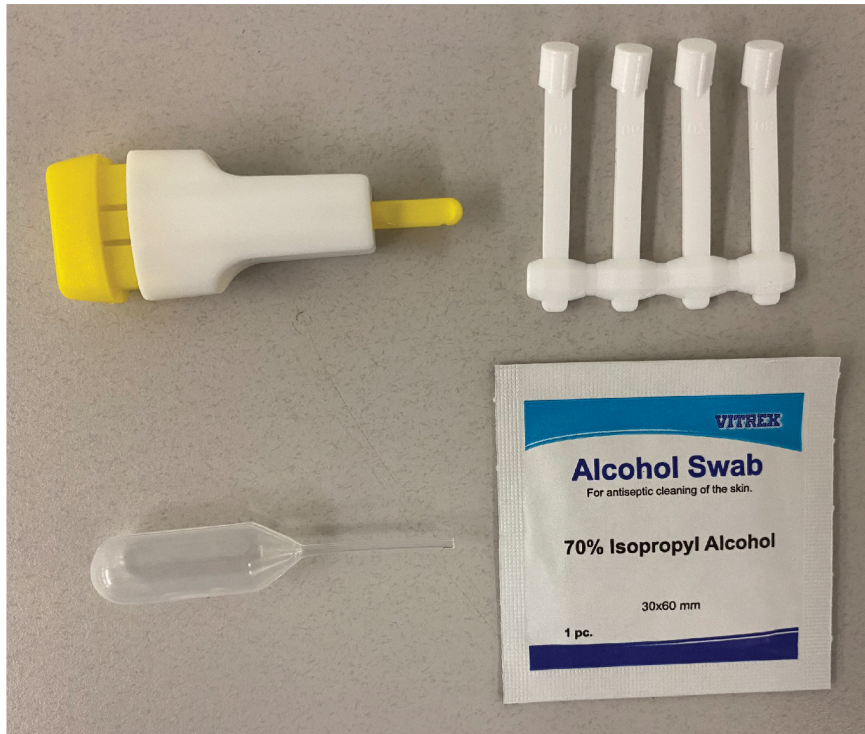

**B**

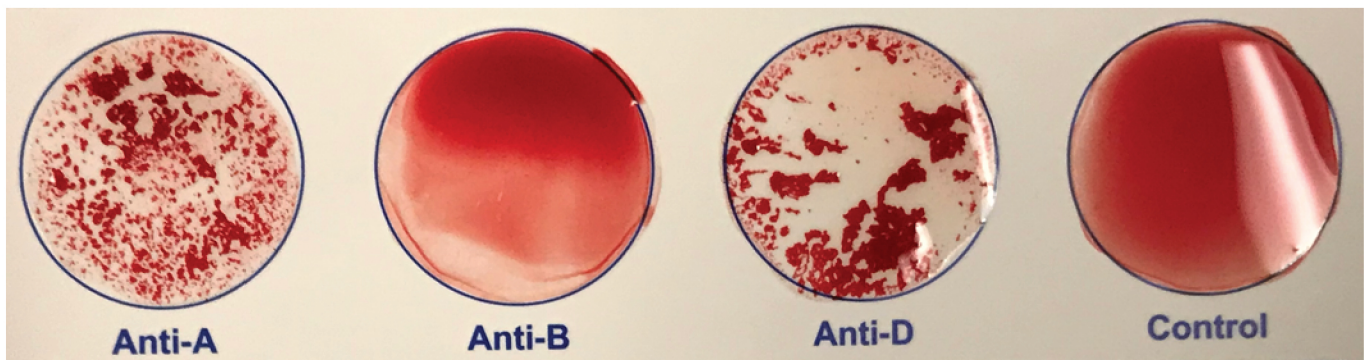

**Supplemental Figure 2**  
**Tilted Card Evaluation**

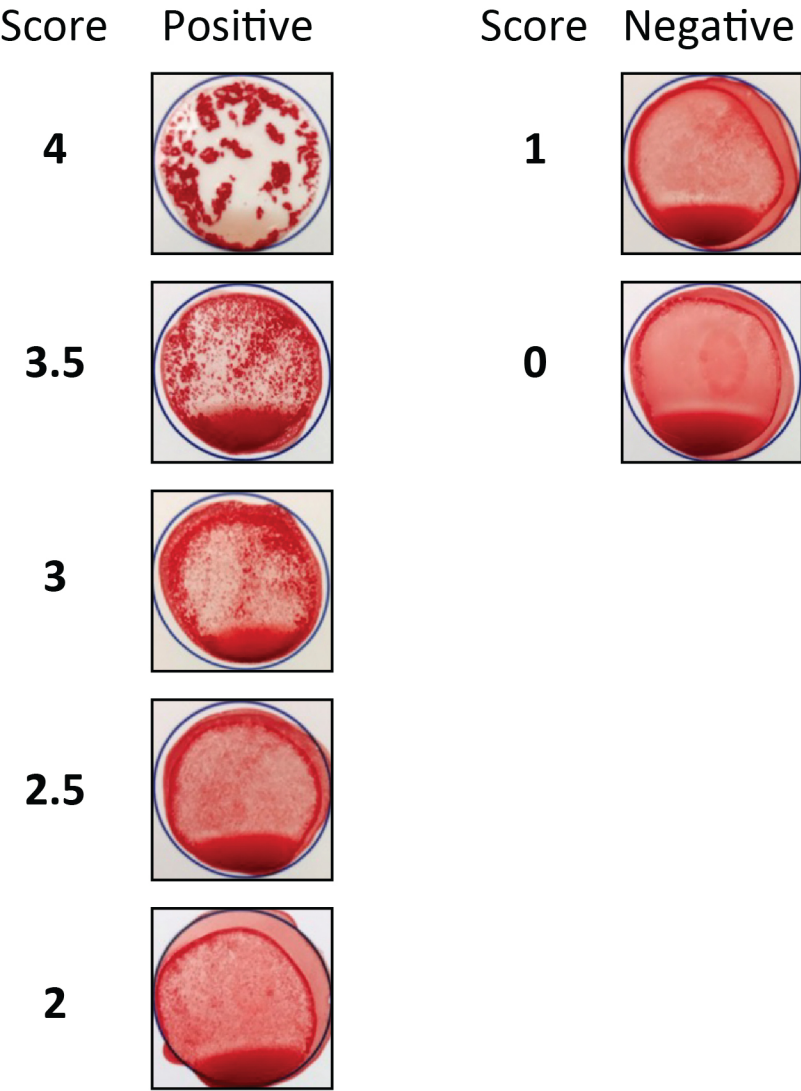

Supplement: Supplementary file [file media-1.pdf]
